# Supplementary material for: Genetic markers of inflammation may not contribute to metabolic traits in Mexican children
Source: PeerJ. 2016 Jun 23;4:e2090. doi: 10.7717/peerj.2090 (PMC4924140; doi:10.7717/peerj.2090)
Supplement: Supplemental Information 1 [file peerj-04-2090-s001.docx]

**Supplementary Information**

**Genetic markers of inflammation do not contribute to metabolic traits in Mexican children**Neeti Vashi1, Carolina Stryjecki1, Jesus Peralta-Romero2, Fernando Suarez2, Jaime Gomez-Zamudio2, Ana I. Burguete-Garcia3, Miguel Cruz2,*, David Meyre1,4,*1Department of Clinical Epidemiology and Biostatistics, McMaster University, Hamilton, ON, Canada

2Medical Research Unit in Biochemistry, Hospital de Especialidades, Centro Médico Nacional Siglo XXI del Instituto Mexicano del Seguro Social, Mexico City, Mexico

3Centro de investigación sobre enfermedades infecciosas. Instituto Nacional de Salud Pública. Cuernavaca, Morelos, Mexico

4Department of Pathology and Molecular Medicine, McMaster University, Hamilton, ON, Canada.

**Table of Contents**

Supplementary Table 1

Supplementary Figure 1

Supplementary Figure 2

**Supplementary Table 1. Description of the 6 SNPs studied.**

| Gene Name | Chromosomal Physical Location | SNP | Major Allele | Minor Allele | Genotype Count | Call Rate (%) | HWE P-value |
| --- | --- | --- | --- | --- | --- | --- | --- |
| *LEPR* | 1q31.3 | rs1137101 | A | G | 423 712 312 | 98.97 | 0.70 |
| *HNF1A* | 12q24.31 | rs7305618 | C | T | 1083 300 27 | 96.44 | 0.25 |
| *TNFA* | 6p21.3 | rs1800629 | G | A | 1343 118 1 | 100 | 0.33 |
| *IL-10* | 1q31-32 | rs1800896 | T | C | 791 527 84 | 95.90 | 0.76 |
| rs1800871 | G | A | 473 732 248 | 99.38 | 0.22 |
| *RETN* | 19p13.2 | rs1862513 | C | G | 1089 275 19 | 94.60 | 0.73 |

**Supplementary Figure 1. Power Calculation for the main effect of the SNPs on BMI.** Two-sided P-value of 0.05, 80% power.

**Supplementary Figure 2. Power calculation for the main effect of SNPs on BMI with Bonferroni correction.** Two sided P-value of 4.6x10-4, 80% power.
